*Department of Anesthesiology  
Mayo Clinic and Mayo Medical School  
Rochester, Minnesota 55905*

REFERENCES

1. Black S, Ockert DB, Oliver WC, Cucchiara RF: Outcome following posterior fossa craniectomy in patients in the sitting or horizontal positions. *ANESTHESIOLOGY* 69:49-56, 1988
2. Grady MS, Bedford RF, Park TS: Changes in superior sagittal

sinus pressure in children with head elevation, jugular venous compression, and PEEP. *J Neurosurg* 65:199-202, 1986

3. Toung T, Ngeow YK, Long DL, Rogers MC, Traystman RJ: Comparison of the effects of positive end-expiratory pressure and jugular venous compression on canine cerebral venous pressure. *ANESTHESIOLOGY* 61:169-172, 1984
4. Black S, Cucchiara RF, Nishimura RA, Michenfelder JD: Parameters affecting the occurrence of paradoxical air embolism. *ANESTHESIOLOGY* 71:235-241, 1989

*(Accepted for publication October 18, 1991.)*

Anesthesiology  
76:157, 1992

Information Needed for Development of Practice Parameters

*To the Editor:*—The ASA Task Force on Practice Parameters—Pulmonary Artery Catheterization is seeking input from the ASA membership in preparing Guidelines for Pulmonary Artery Catheterization. To help the Task Force ensure that it has access to all relevant information regarding indications for and value of pulmonary artery catheterization, members of the Task Force would appreciate having references to scientific articles or to other published information that you have found useful in guiding your use of these catheters. Furthermore, an open forum will be held to discuss the guidelines and their draft development on March 15, 1992, from 2:00 PM to 5:00 PM at the IARS Meeting in San Francisco. You will have an opportunity to review the guidelines before that and to comment and have input into the guidelines by talking to members of the Task Force. The Task Force is also interested in reviewing unpublished draft articles, abstracts, or other information on pulmonary artery catheterization. Please send your lists of references, articles, or copies of unpublished documents to me at the address below.

MICHAEL F. ROIZEN, M.D.  
*Chairman, ASA Task Force on Practice  
Parameters—Pulmonary Artery  
Catheterization  
Department of Anesthesia and Critical  
Care  
The University of Chicago  
5841 South Maryland Avenue, Box 428  
Chicago, Illinois 60637  
Fax Number: (312) 702-3535*

*(Accepted for publication December 2, 1991.)*
